# Supplementary material
Source: PubMed Central journal article supplement (PMC263849)
Supplement: pnas_100_23_13537__2.pdf [file pnas_100_23_13537__2.pdf]

**Table 3.** Cox proportional hazards regression analysis of clinical–pathological variables and patient survival

| Variables                       | <i>n</i> | Hazard ratio | 95% CI     | <i>P</i> value |
|---------------------------------|----------|--------------|------------|----------------|
| Age 64.1 (39.4-84.1)            |          |              |            |                |
| <65                             | 48       |              |            |                |
| >65                             | 42       | 1.29         | 0.63-2.66  | 0.49           |
| Gender                          |          |              |            |                |
| Female                          | 51       |              |            |                |
| Male                            | 39       | 1.65         | 0.81-3.35  | 0.16           |
| Race                            |          |              |            |                |
| Asian, Black                    | 8        |              |            |                |
| White                           | 73       | 0.94         | 0.28-3.13  | 0.92           |
| Smoking                         |          |              |            |                |
| Nonsmoking                      | 10       |              |            |                |
| Smoking                         | 76       | 1.88         | 0.44-7.91  | 0.38           |
| Stage                           |          |              |            |                |
| I                               | 62       |              |            |                |
| III                             | 28       | 4.47         | 2.17-9.21  | <0.0001        |
| T status                        |          |              |            |                |
| T1                              | 48       |              |            |                |
| T2-T4                           | 42       | 2.69         | 1.27-5.72  | 0.007          |
| N status                        |          |              |            |                |
| N0                              | 66       |              |            |                |
| N1, N2                          | 24       | 5.38         | 2.61-11.1  | <0.0001        |
| Classification                  |          |              |            |                |
| Bronchoalveolar                 | 14       |              |            |                |
| Bronch-derived                  | 72       | 1.60         | 0.48-5.33  | 0.43           |
| Differentiation                 |          |              |            |                |
| Well, moderate                  | 70       |              |            |                |
| Poor                            | 20       | 1.97         | 0.89-4.31  | 0.08           |
| Tumor location                  |          |              |            |                |
| Left lobe                       | 31       |              |            |                |
| Right lobe                      | 59       | 0.54         | 0.26-1.11  | 0.08           |
| Pleural surface involvement     |          |              |            |                |
| No                              | 79       |              |            |                |
| Yes                             | 11       | 4.52         | 1.99-10.3  | <0.0001        |
| Lymphocytic response            |          |              |            |                |
| No                              | 51       |              |            |                |
| Yes                             | 39       | 0.37         | 0.16-0.83  | 0.01           |
| Angiolymphatic invasion         |          |              |            |                |
| No                              | 75       |              |            |                |
| Yes                             | 15       | 3.31         | 1.55-7.1   | 0.001          |
| P53 nuclear accumulation        |          |              |            |                |
| Negative                        | 69       |              |            |                |
| Positive                        | 19       | 0.69         | 0.304-1.54 | 0.36           |
| K- <i>ras</i> mutational status |          |              |            |                |
| Negative                        | 40       |              |            |                |
| Positive                        | 34       | 0.57         | 0.25-1.31  | 0.18           |

CI, confidence interval.
