# Supplementary material
Source: PubMed Central journal article supplement (PMC263849)
Supplement: pnas_100_23_13537__3.pdf [file pnas_100_23_13537__3.pdf]

**Table 5. Relationships between clinical–pathological variables and survival-associated protein expression: *P* value and direction of association**

| Protein name | Spot No. | Tumor (vs. normal) (90 vs. 10)* | Stage I (vs. III) (62 vs. 28) | BD (vs. BA) (72 vs. 14) | Poor (20) | Differentiation Well (22) | Moderate (48) | PAI (vs no-PAI) (15 vs 75) | PLR (vs. no-PLR) (39 vs. 51) | PSI (vs. no-PSI) (11 vs. 79) |
|--------------|----------|---------------------------------|-------------------------------|-------------------------|-----------|---------------------------|---------------|----------------------------|------------------------------|------------------------------|
| ANXA1        | 1245     | + 0.02 <sup>†</sup>             |                               |                         |           |                           |               |                            |                              |                              |
| GRK4         | 477      | + 0.002                         |                               |                         |           |                           |               |                            |                              |                              |
| KRT19        | 1955     | + 0.016                         |                               |                         |           |                           |               |                            |                              |                              |
| KRT7         | 1968     | + 0.049                         |                               |                         |           |                           |               |                            |                              | - 0.025                      |
| ACTB/G       | 634      | - <0.001                        |                               |                         |           |                           |               |                            |                              |                              |
| FGF4         | 1331     | - <0.001                        |                               |                         |           |                           |               | + 0.024                    | - 0.031                      |                              |
| MYCN         | 1268     | - <0.001                        |                               |                         |           | - 0.028                   |               |                            |                              |                              |
| AAT          | 1413     | - <0.001                        |                               |                         |           |                           |               |                            |                              |                              |
| GFAP         | 2336     |                                 | + 0.007                       | + 0.008                 | + 0.003   |                           | - 0.003       | + 0.024                    |                              |                              |
| GSTP1        | 1298     |                                 | + 0.027                       |                         |           |                           |               |                            |                              |                              |
| ANXA8        | 923      |                                 | - 0.001                       |                         |           |                           |               |                            |                              |                              |
| KRT1         | 1888     |                                 |                               | + 0.038                 |           |                           |               |                            |                              |                              |
| PDIR5        | 513      |                                 |                               | + 0.046                 |           |                           |               |                            |                              |                              |
| SOD2         | 1328     |                                 |                               | + 0.005                 |           |                           |               |                            |                              | + 0.001                      |
| KRT7         | 691      |                                 |                               | - 0.022                 |           |                           |               |                            | - 0.011                      |                              |
| RAB7         | 1262     |                                 |                               | - 0.031                 |           |                           |               |                            |                              | - 0.017                      |
| EPHX1        | 891      |                                 |                               |                         | - 0.031   |                           | + 0.031       |                            |                              |                              |
| ENO1B        | 627      |                                 |                               |                         |           |                           |               | + 0.023                    | - 0.030                      |                              |
| PGAM1        | 1160     |                                 |                               |                         |           |                           |               | + 0.037                    |                              | + 0.008                      |

+, Significantly increased; -, significantly decreased. BD, bronchial-derived; BA, bronchoalveolar; PAI, presence of angiolymphatic invasion; PLR, presence of lymphocytic response; PSI, pleural surface involvement. PBP (1546#) was significantly decreased based on smoking status (vs non-smoking,  $P = 0.044$ ) and presence of *K-ras* mutation ( $P = 0.016$ ). CALU (1738#) was significantly increased in the presence of *K-ras* mutation ( $P = 0.046$ ) and p53 accumulation ( $P = 0.029$ ). Other known survival-associated proteins did not change in all these variables.

\*Number in parentheses indicates number of samples used in each group.

<sup>†</sup>Significantly increased in tumor compared to normal lung with  $P$  value = 0.02 based on F test.
