# Supplementary material
Source: PubMed Central journal article supplement (PMC263849)
Supplement: pnas_100_23_13537__4.pdf [file pnas_100_23_13537__4.pdf]

**Table 6.** Multivariable Cox proportional hazards regression analyses of PGK1 with other variables

|                             | <b>2D protein data (90)</b> |              | <b>mRNA data (86)</b> |             | <b>Serum ELISA<sup>†</sup> (107)</b> |             |
|-----------------------------|-----------------------------|--------------|-----------------------|-------------|--------------------------------------|-------------|
|                             | <b><i>P</i> value</b>       | <b>PGK1*</b> | <b><i>P</i> value</b> | <b>PGK1</b> | <b><i>P</i> value</b>                | <b>PGK1</b> |
| Stage                       | 0.0003                      | 0.061        | 0.0003                | 0.49        | 0.0003                               | 0.016       |
| T status                    | 0.087                       | 0.015        | 0.1                   | 0.09        |                                      |             |
| N status                    | 0.0001                      | 0.093        | 0.0001                | 0.7         |                                      |             |
| Differentiation             | 0.018                       | 0.001        | 0.7                   | 0.034       |                                      |             |
| Pleural surface involvement | 0.0004                      | 0.01         | 0.0001                | 0.029       |                                      |             |
| Lymphocytic response        | 0.036                       | 0.021        | 0.09                  | 0.025       |                                      |             |
| Angiolymphatic invasion     | 0.007                       | 0.022        | 0.32                  | 0.018       |                                      |             |

Two variables (PGK1 + one other variable) were used each time in this multivariable model.

Sample number is shown in parentheses. PGK, phosphoglycerate kinase 1.

\**P* value of PGK1 when combined with other one variable in this multivariable Cox model.

<sup>†</sup>Other variables besides stage are not available in this data set.
